# Supplementary material for: Virulence Pattern Analysis of Three Listeria monocytogenes Lineage I Epidemic Strains with Distinct Outbreak Histories
Source: MDPI journal article supplement (doi:10.3390/microorganisms9081745), 2021-08-16
Supplement: s1 [file s1]

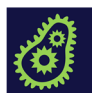

**Table S1.** p-values comparing bacterial loads in the liver of animal infected with the different strains day 3 to 20 post infection (p.i.).  $p < 0.05$  was considered as statistically significant difference (bold) as determined by the tukey-HSD posthoc test.

| Days p.i.     | Comparison | PF49         | F80594       | G6006        | EGD   |
|---------------|------------|--------------|--------------|--------------|-------|
| <b>Day 3</b>  | F80594     | 0.126        | 1.000        |              |       |
|               | G6006      | <b>0.005</b> | 0.452        | 1.000        |       |
|               | EGD        | <b>0.005</b> | 0.448        | 1.000        | 1.000 |
| <b>Day 5</b>  | F80594     | 0.640        | 1.000        |              |       |
|               | G6006      | <b>0.002</b> | <b>0.023</b> | 1.000        |       |
|               | EGD        | 0.345        | 0.953        | 0.069        | 1.000 |
| <b>Day 7</b>  | F80594     | <b>0.000</b> | 1.000        |              |       |
|               | G6006      | <b>0.000</b> | 0.261        | 1.000        |       |
|               | EGD        | <b>0.002</b> | 0.396        | <b>0.011</b> | 1.000 |
| <b>Day 10</b> | F80594     | <b>0.003</b> | 1.000        |              |       |
|               | G6006      | <b>0.000</b> | 0.694        | 1.000        |       |
|               | EGD        | <b>0.000</b> | 0.694        | 1.000        | 1.000 |
| <b>Day 12</b> | F80594     | 0.910        | 1.000        |              |       |
|               | G6006      | 0.174        | 0.467        | 1.000        |       |
|               | EGD        | 0.174        | 0.467        | 1.000        | 1.000 |
| <b>Day 14</b> | F80594     | 0.168        | 1.000        |              |       |
|               | G6006      | 1.000        | 0.168        | 1.000        |       |
|               | EGD        | 1.000        | 0.168        | 1.000        | 1.000 |
| <b>Day 20</b> | F80594     | <b>0.030</b> | 1.000        |              |       |
|               | G6006      | <b>0.030</b> | 1.000        | 1.000        |       |
|               | EGD        | <b>0.030</b> | 1.000        | 1.000        | 1.000 |
